# Supplementary material for: Sublingual Dexmedetomidine for Agitation Associated with Schizophrenia or Bipolar Disorder: A Post Hoc Analysis of Number Needed to Treat, Number Needed to Harm, and Likelihood to be Helped or Harmed
Source: Springer Nature journal article supplement (doi:10.1007/s12325-022-02274-3), 2022-08-24
Supplement: MOESM1 [file 23400046]

**Sublingual Dexmedetomidine for Agitation Associated with Schizophrenia or Bipolar Disorder: A Post Hoc Analysis of Number Needed to Treat, Number Needed to Harm, and Likelihood to Be Helped or Harmed**

Leslie Citrome, MD, MPH;<sup>1</sup> Robert Risinger, MD;<sup>2</sup> Lavanya Rajachandran, PhD;<sup>2</sup> Heather Robison, MPP<sup>2</sup>

<sup>1</sup> Department of Psychiatry and Behavioral Sciences, New York Medical College, Valhalla, NY, USA

<sup>2</sup> BioXcel Therapeutics, Inc., New Haven, CT, USA

Corresponding author

Leslie Citrome, MD, MPH

11 Medical Park Drive, Suite 102

Pomona, NY 10970

Email: [nntman@gmail.com](mailto:nntman@gmail.com)

Tel: (845) 362-2081

ORCID ID: 0000-0002-6098-9266

Co-Authors

Robert Risinger, MD

BioXcel Therapeutics

555 Long Wharf Drive

New Haven, CT 06511

[rrisinger@bioxceltherapeutics.com](mailto:rrisinger@bioxceltherapeutics.com)

Lavanya Rajachandran, PhD

BioXcel Therapeutics

555 Long Wharf Drive

New Haven, CT 06511

[lrajachandran@bioxceltherapeutics.com](mailto:lrajachandran@bioxceltherapeutics.com)

Heather Robison, MPP

BioXcel Therapeutics

555 Long Wharf Drive

New Haven, CT 06511

[hrobison@bioxceltherapeutics.com](mailto:hrobison@bioxceltherapeutics.com)

Table S1. Response rate, absolute risk reduction, and number needed to treat at time points from 10 minutes to 24 hours postdose in the pooled population of adults with schizophrenia or bipolar disorder

| Time postdose | PEC Response <sup>a</sup>  |                 |                        |                  | Absolute Risk Reduction <sup>b</sup> |                   |                        | Number Needed to Treat     |                      |                        |
|---------------|----------------------------|-----------------|------------------------|------------------|--------------------------------------|-------------------|------------------------|----------------------------|----------------------|------------------------|
|               | n (%)                      |                 |                        |                  | % (95% CI)                           |                   |                        | (95% CI)                   |                      |                        |
|               | Sublingual dexmedetomidine |                 |                        |                  | Sublingual dexmedetomidine           |                   |                        | Sublingual dexmedetomidine |                      |                        |
|               | 180 ug<br>n=251            | 120 ug<br>n=255 | 120 or 180 ug<br>n=506 | Placebo<br>n=252 | 180 ug<br>n=251                      | 120 ug<br>n=255   | 120 or 180 ug<br>n=506 | 180 ug<br>n=251            | 120 ug<br>n=255      | 120 or 180 ug<br>n=506 |
| 10 minutes    | 30 (12.0)*                 | 22 (8.6)        | 52 (10.3)*             | 14 (5.6)         | 6.4 (1.5, 11.3)                      | 3.1 (-1.4, 7.5)   | 4.7 (.8, 8.6)          | 16 (9, 68)                 | 33 (ns) <sup>c</sup> | 22 (12, 118)           |
| 20 minutes*   | 72 (28.7)                  | 53 (20.8)       | 125 (24.7)             | 33 (13.1)        | 15.6 (8.6, 22.6)                     | 7.7 (1.2, 14.2)   | 11.6 (6.0, 17.2)       | 7 (5, 12)                  | 14 (8, 84)           | 9 (6, 17)              |
| 30 minutes*   | 106 (42.2)                 | 94 (36.9)       | 200 (39.5)             | 64 (25.4)        | 16.8 (8.7, 25.0)                     | 11.5 (3.5, 19.5)  | 14.1 (7.3, 21.0)       | 6 (5, 12)                  | 9 (6, 29)            | 8 (5, 14)              |
| 45 minutes*   | 152 (60.6)                 | 131 (51.4)      | 283 (55.9)             | 83 (32.9)        | 27.6 (19.2, 36.0)                    | 18.4 (10.0, 26.9) | 23.0 (15.8, 30.2)      | 4 (3, 6)                   | 6 (4, 11)            | 5 (4, 7)               |
| 1 hour*       | 186 (74.1)                 | 170 (66.7)      | 356 (70.4)             | 95 (37.7)        | 36.4 (28.3, 44.5)                    | 29.0 (20.6, 37.3) | 32.7 (25.5, 39.8)      | 3 (3, 4)                   | 4 (3, 5)             | 4 (3, 4)               |
| 1.5 hours*    | 217 (86.5)                 | 187 (73.3)      | 404 (79.8)             | 99 (39.3)        | 47.2 (39.8, 54.5)                    | 34.0 (25.9, 42.2) | 40.6 (33.6, 47.5)      | 3 (2, 3)                   | 3 (3, 4)             | 3 (3, 3)               |
| 2 hours*      | 225 (89.6)                 | 199 (78.0)      | 424 (83.8)             | 109 (43.3)       | 46.4 (39.2, 53.6)                    | 34.8 (26.8, 42.7) | 40.5 (33.6, 47.4)      | 3 (2, 3)                   | 3 (3, 4)             | 3 (3, 3)               |
| 4 hours*      | 219 (87.3)                 | 178 (69.8)      | 397 (78.5)             | 100 (39.7)       | 47.6 (40.3, 54.9)                    | 30.1 (21.9, 38.4) | 38.8 (31.8, 45.8)      | 3 (2, 3)                   | 4 (3, 5)             | 3 (3, 4)               |
| 6 hours*      | 221 (88.0)                 | 187 (73.3)      | 408 (80.6)             | 112 (44.4)       | 43.6 (36.3, 50.9)                    | 28.9 (20.7, 37.1) | 36.2 (29.2, 43.2)      | 3 (2, 3)                   | 4 (3, 5)             | 3 (3, 4)               |
| 8 hours*      | 223 (88.8)                 | 185 (72.5)      | 408 (80.6)             | 131 (52.0)       | 36.9 (29.6, 44.2)                    | 20.6 (12.3, 28.8) | 28.6 (21.6, 35.7)      | 3 (3, 4)                   | 5 (4, 9)             | 4 (3, 5)               |
| 24 hours*     | 147 (58.6)                 | 135 (52.9)      | 282 (55.7)             | 86 (34.1)        | 24.4 (16.0, 32.9)                    | 18.8 (10.3, 27.3) | 21.6 (14.3, 28.9)      | 5 (4, 7)                   | 6 (4, 10)            | 5 (4, 7)               |

\*Nominal  $P < .05$  in the main studies, indicating treatment response rates significantly different from placebo, based on Fisher's exact test.

<sup>a</sup>Defined as a  $\geq 40\%$  reduction from baseline as measured by the 5-item Positive and Negative Syndrome Scale-Excited Component.

<sup>b</sup>Sublingual dexmedetomidine vs placebo.

<sup>c</sup>Not statistically significant; the 95% CI contains "infinity".

Abbreviations: CI, confidence interval; ns, not statistically significant; PEC, Positive and Negative Syndrome Scale-Excited Component.

Table S2. Incidence of somnolence events by time of onset and association with mean ACES score for adults with schizophrenia and bipolar disorder.

|                           | Somnolence, hours postdose | Sublingual dexmedetomidine |     |      |        |     |      | Placebo   |                  |                | All sublingual dexmedetomidine |                  |                |
|---------------------------|----------------------------|----------------------------|-----|------|--------|-----|------|-----------|------------------|----------------|--------------------------------|------------------|----------------|
|                           |                            | 180 ug                     |     |      | 120 ug |     |      | Events, n | ACES score, mean | ACES score, SD | Events, n                      | ACES score, mean | ACES score, SD |
| <b>Schizophrenia</b>      |                            |                            |     |      |        |     |      |           |                  |                |                                |                  |                |
| Any Severity <sup>a</sup> | 0 to 2 h                   | 25                         | 2.4 | 0.58 | 26     | 2.5 | 1.03 | 9         | 2.3              | 0.50           | 51                             | 2.4              | 0.83           |
|                           | >2 to 4 h                  | 2                          | 4.0 | 1.41 | 1      | 5.0 |      | 1         | 2.0              |                | 3                              | 4.3              | 1.15           |
|                           | >4 to 8 h                  | 1                          | 2.0 |      | .      | .   |      | .         | .                |                | 1                              | 2.0              |                |
|                           | Any hour (0 - 8)           | 28                         | 2.5 | 0.75 | 27     | 2.6 | 1.12 | 10        | 2.3              | 0.48           | 55                             | 2.5              | 0.94           |
| Mild                      | 0 to 2 h                   | 21                         | 2.5 | 0.60 | 23     | 2.5 | 1.08 | 9         | 2.3              | 0.50           | 44                             | 2.5              | 0.88           |
|                           | >2 to 4 h                  | 2                          | 4.0 | 1.41 | 1      | 5.0 |      | 1         | 2.0              |                | 3                              | 4.3              | 1.15           |
|                           | >4 to 8 h                  | 1                          | 2.0 |      | .      | .   |      | .         | .                |                | 1                              | 2.0              |                |
|                           | Any hour (0 - 8)           | 24                         | 2.6 | 0.78 | 24     | 2.6 | 1.18 | 10        | 2.3              | 0.48           | 48                             | 2.6              | 0.99           |
| Moderate                  | 0 to 2 h                   | 4                          | 2.0 | 0.00 | 3      | 2.3 | 0.58 | .         | .                |                | 7                              | 2.1              | 0.38           |
|                           | Any hour (0 - 2)           | 4                          | 2.0 | 0.00 | 3      | 2.3 | 0.58 | .         | .                |                | 7                              | 2.1              | 0.38           |
| <b>Bipolar Disorder</b>   |                            |                            |     |      |        |     |      |           |                  |                |                                |                  |                |
| Any Severity              | 0 to 2 h                   | 26                         | 2.2 | 0.40 | 25     | 2.2 | 0.66 | 5         | 2.6              | 0.55           | 51                             | 2.2              | 0.54           |
|                           | >2 to 4 h                  | 1                          | 7.0 |      | 1      | 2.0 |      | 1         | 5.0              |                | 2                              | 4.5              | 3.54           |
|                           | Any hour (0 - 4)           | 27                         | 2.4 | 1.01 | 26     | 2.2 | 0.65 | 6         | 3.0              | 1.10           | 53                             | 2.3              | 0.85           |
| Mild                      | 0 to 2 h                   | 15                         | 2.3 | 0.46 | 18     | 2.3 | 0.77 | 5         | 2.6              | 0.55           | 33                             | 2.3              | 0.64           |
|                           | >2 to 4 h                  | 1                          | 7.0 |      | 1      | 2.0 |      | 1         | 5.0              |                | 2                              | 4.5              | 3.54           |
|                           | Any hour (0 - 4)           | 16                         | 2.6 | 1.26 | 19     | 2.3 | 0.75 | 6         | 3.0              | 1.10           | 35                             | 2.4              | 1.01           |
| Moderate                  | 0 to 2 h                   | 11                         | 2.1 | 0.30 | 7      | 2.0 | 0.00 | .         | .                |                | 18                             | 2.1              | 0.24           |
|                           | Any hour (0 - 2)           | 11                         | 2.1 | 0.30 | 7      | 2.0 | 0.00 | .         | .                |                | 18                             | 2.1              | 0.24           |

<sup>a</sup> Excludes one subject who received sublingual dexmedetomidine 180 ug and experienced moderate somnolence on Day 3 and reported an ACES score of 7 at Day 1, hour 8. Excludes one subject who received sublingual dexmedetomidine 120 ug and experienced mild somnolence on Day 6 and reported an ACES score of 6 at Day 1, hour 8.

ACES rates overall agitation and sedation, where 1 indicates marked agitation; 2 - moderate agitation; 3 - mild agitation; 4 - normal behavior; 5 - mild calmness; 6 - moderate calmness; 7 - marked calmness; 8 - deep sleep; and 9 - unarousable.

Severity of somnolence was assessed by the investigator(s) and rated as mild, moderate, or severe, as defined in the study protocol: Mild: Is usually transient and may require only minimal treatment or therapeutic intervention. The event does not generally interfere with usual activities of daily living. Moderate: Is usually alleviated with additional specific therapeutic intervention. The event interferes with usual activities of daily living, causing discomfort but poses no significant or permanent risk of harm to the subject.

Severe: Interrupts usual activities of daily living, significantly affects clinical status, or may require intensive therapeutic intervention.

Abbreviations: ACES, Agitation-Calmness Evaluation Scale; SD, standard deviation

Table S3. Incidence of delayed<sup>a</sup> adverse events with sublingual dexmedetomidine or placebo, number needed to harm, and likelihood to be helped or harmed in adults with schizophrenia

|                                          | Incidence<br>n (%)            |                 |                  | Number Needed to Harm <sup>b</sup><br>(95% CI) |                         | Likelihood to be Helped or Harmed<br>(NNH/NNT <sup>c</sup> ) |                 |
|------------------------------------------|-------------------------------|-----------------|------------------|------------------------------------------------|-------------------------|--------------------------------------------------------------|-----------------|
|                                          | Sublingual<br>dexmedetomidine |                 |                  | Sublingual dexmedetomidine                     |                         | Sublingual dexmedetomidine                                   |                 |
|                                          | 180 ug<br>n=126               | 120 ug<br>n=129 | Placebo<br>n=126 | 180 ug<br>n=126                                | 120 ug<br>n=129         | 180 ug<br>n=126                                              | 120 ug<br>n=129 |
| <b>Adverse event of special interest</b> |                               |                 |                  |                                                |                         |                                                              |                 |
| Cardiac/vascular disorder                | 6 (4.8)                       | 8 (6.2)         | 3 (2.4)          | 42 (ns) <sup>e</sup>                           | 27 (ns) <sup>e</sup>    | 21.0                                                         | 6.8             |
| Hypotension/bradycardia(s)               | 0                             | 4 (3.1)         | 0                | (nd)                                           | 33 (17, 914)            | NA                                                           | 8.3             |
| Hypotension                              | 0                             | 4 (3.1)         | 0                | (nd)                                           | 33 (17, 914)            | NA                                                           | 8.3             |
| <b>Adverse event<sup>d</sup></b>         |                               |                 |                  |                                                |                         |                                                              |                 |
| Orthostatic hypotension                  | 6 (4.8)                       | 2 (1.6)         | 0                | 21 (12, 96)                                    | 65 (ns) <sup>e</sup>    | 10.5                                                         | 16.3            |
| Headache                                 | 3 (2.4)                       | 5 (3.9)         | 3 (2.4)          | (nd)                                           | 67 (ns) <sup>e</sup>    | NA                                                           | 16.8            |
| Somnolence                               | 4 (3.2)                       | 2 (1.6)         | 1 (0.8)          | 42 (ns) <sup>e</sup>                           | 133 (ns) <sup>e</sup>   | 21.0                                                         | 33.3            |
| Dizziness                                | 2 (1.6)                       | 1 (0.8)         | 0                | 63 (ns) <sup>e</sup>                           | 129 (ns) <sup>e</sup>   | 31.5                                                         | 32.3            |
| Dry mouth                                | 0                             | 1 (0.8)         | 1 (0.8)          | -126 (ns) <sup>e</sup>                         | -5418 (ns) <sup>e</sup> | NA                                                           | NA              |

<sup>a</sup> Occurring after the first 2 hours postdose

<sup>b</sup> A negative NNH denotes an advantage for sublingual dexmedetomidine relative to placebo and is not interpretable as a harm.

<sup>c</sup> Using NNT for response at 2 hours postdose (refer to Table 1).

<sup>d</sup> Reported by at least 2% of subjects in the safety population (all subjects who received a dose of study drug).

<sup>e</sup> Not statistically significant; the 95% CI contains "infinity".

Abbreviations: CI, confidence interval; NA, not applicable; NNT, number needed to treat; NNH, number needed to harm; nd, no difference; ns, not statistically significant.

Table S4. Incidence of delayed<sup>a</sup> adverse events with sublingual dexmedetomidine or placebo, number needed to harm, and likelihood to be helped or harmed in adults with bipolar disorder

|                                          | Incidence<br>n (%)            |                 |                  | Number Needed to Harm <sup>b</sup><br>(95% CI) |                        | Likelihood to be Helped or Harmed<br>(NNH/NNT <sup>c</sup> ) |                 |
|------------------------------------------|-------------------------------|-----------------|------------------|------------------------------------------------|------------------------|--------------------------------------------------------------|-----------------|
|                                          | Sublingual<br>dexmedetomidine |                 |                  | Sublingual dexmedetomidine                     |                        | Sublingual dexmedetomidine                                   |                 |
|                                          | 180 ug<br>n=126               | 120 ug<br>n=126 | Placebo<br>n=126 | 180 ug<br>n=126                                | 120 ug<br>n=126        | 180 ug<br>n=126                                              | 120 ug<br>n=126 |
| <b>Adverse event of special interest</b> |                               |                 |                  |                                                |                        |                                                              |                 |
| Cardiac/vascular disorder                | 9 (7.1)                       | 7 (5.6)         | 2 (1.6)          | 18 (10, 180)                                   | 26 (ns) <sup>e</sup>   | 6.0                                                          | 6.5             |
| Hypotension/bradycardia(s)               | 3 (2.4)                       | 3 (2.4)         | 0                | 42 (ns) <sup>e</sup>                           | 42 (ns) <sup>e</sup>   | 14.0                                                         | 10.5            |
| Bradycardia(s)                           | 3 (2.4)                       | 2 (1.6)         | 0                | 42 (ns) <sup>e</sup>                           | 63 (ns) <sup>e</sup>   | 14.0                                                         | 15.8            |
| Hypotension                              | 3 (2.4)                       | 3 (2.4)         | 0                | 42 (ns) <sup>e</sup>                           | 42 (ns) <sup>e</sup>   | 14.0                                                         | 10.5            |
| <b>Adverse event<sup>d</sup></b>         |                               |                 |                  |                                                |                        |                                                              |                 |
| Orthostatic hypotension                  | 5 (4.0)                       | 4 (3.2)         | 1 (0.8)          | 32 (ns) <sup>e</sup>                           | 42 (ns) <sup>e</sup>   | 10.7                                                         | 10.5            |
| Dizziness                                | 3 (2.4)                       | 3 (2.4)         | 0                | 42 (ns) <sup>e</sup>                           | 42 (ns) <sup>e</sup>   | 14.0                                                         | 10.5            |
| Nausea                                   | 3 (2.4)                       | 2 (1.6)         | 0                | 42 (ns) <sup>e</sup>                           | 63 (ns) <sup>e</sup>   | 14.0                                                         | 15.8            |
| Dry mouth                                | 2 (1.6)                       | 1 (0.8)         | 0                | 63 (ns) <sup>e</sup>                           | 126 (ns) <sup>e</sup>  | 21.0                                                         | 31.5            |
| Headache                                 | 1 (0.8)                       | 2 (1.6)         | 3 (2.4)          | -63 (ns) <sup>e</sup>                          | -126 (ns) <sup>e</sup> | NA                                                           | NA              |

<sup>a</sup>Occurring after the first 2 hours postdose

<sup>b</sup>A negative NNH denotes an advantage for sublingual dexmedetomidine relative to placebo and is not interpretable as a harm.

<sup>c</sup>Using NNT for response at 2 hours postdose (refer to Table 1).

<sup>d</sup>Reported by at least 2% of subjects in the safety population (all subjects who received a dose of study drug).

<sup>e</sup>Not statistically significant; the 95% CI contains “infinity”.

Abbreviations: CI, confidence interval; NA, not applicable; NNT, number needed to treat; NNH, number needed to harm; ns, not statistically significant.

Table S5. Response rate (based on CGI-I), absolute risk reduction, and number needed to treat at time points from 10 minutes to 24 after a dose of sublingual dexmedetomidine in patients with schizophrenia or bipolar disorder

| Time postdose    | CGI-I Response <sup>a</sup> |            |                  |           | Absolute Risk Reduction <sup>b</sup> |                   |                           | Number Needed to Treat     |            |                  |
|------------------|-----------------------------|------------|------------------|-----------|--------------------------------------|-------------------|---------------------------|----------------------------|------------|------------------|
|                  | n (%)                       |            |                  |           | % (95% CI)                           |                   |                           | (95% CI)                   |            |                  |
|                  | Sublingual dexmedetomidine  |            |                  |           | Sublingual dexmedetomidine           |                   |                           | Sublingual dexmedetomidine |            |                  |
|                  | 180 ug                      | 120 ug     | 120 ug or 180 ug | Placebo   | 180 ug (95% CI)                      | 120 ug (95% CI)   | 120 ug or 180 ug (95% CI) | 180 ug                     | 120 ug     | 120 ug or 180 ug |
| Schizophrenia    | n=125                       | n=129      | n=254            | n=126     | n=125                                | n=129             | n=254                     | n=125                      | n=129      | n=254            |
| 30 minutes*      | 49 (39.2)                   | 39 (30.2)  | 88 (34.6)        | 20 (15.9) | 23.3 (12.7, 34.0)                    | 14.4 (4.2, 24.5)  | 18.8 (10.1, 27.4)         | 5 (3, 8)                   | 7 (5, 24)  | 6 (4, 10)        |
| 1 hour*          | 86 (68.8)                   | 66 (51.2)  | 152 (59.8)       | 34 (27.0) | 41.8 (30.6, 53.0)                    | 24.2 (12.6, 35.8) | 32.9 (23.0, 42.7)         | 3 (2, 4)                   | 5 (3, 8)   | 4 (3, 5)         |
| 2 hours*         | 108 (86.4)                  | 84 (65.1)  | 192 (75.6)       | 45 (35.7) | 50.7 (40.4, 61.0)                    | 29.4 (17.7, 41.1) | 39.9 (30.0, 49.8)         | 2 (2, 3)                   | 4 (3, 6)   | 3 (3, 4)         |
| 4 hours*         | 106 (84.8)                  | 80 (62.0)  | 186 (73.2)       | 41 (32.5) | 52.3 (41.9, 62.6)                    | 29.5 (17.8, 41.2) | 40.7 (30.9, 50.5)         | 2 (2, 3)                   | 4 (3, 6)   | 3 (2, 4)         |
| Bipolar Disorder | n=126                       | n=126      | n=252            | n=126     | n=126                                | n=126             | n=252                     | n=126                      | n=126      | n=252            |
| 30 minutes       | 37 (29.4)                   | 38 (30.2)  | 75 (29.8)*       | 24 (19.0) | 10.3 (-0.2, 20.8)                    | 11.1 (0.6, 21.7)  | 10.7 (1.8, 19.6)          | 10 (ns) <sup>c</sup>       | 9 (5, 178) | 10 (6, 55)       |
| 1 hour*          | 89 (70.6)                   | 75 (59.5)  | 164 (65.1)       | 37 (29.4) | 41.3 (30.0, 52.5)                    | 30.2 (18.5, 41.9) | 35.7 (25.8, 45.6)         | 3 (2, 4)                   | 4 (3, 6)   | 3 (3, 4)         |
| 2 hours*         | 109 (86.5)                  | 88 (69.8)  | 197 (78.2)       | 48 (38.1) | 48.4 (38.0, 58.8)                    | 31.7 (20.1, 43.4) | 40.1 (30.2, 50.0)         | 3 (2, 3)                   | 4 (3, 5)   | 3 (3, 4)         |
| 4 hours*         | 103 (81.7)                  | 82 (65.1)  | 185 (73.4)       | 43 (34.1) | 47.6 (36.9, 58.3)                    | 31.0 (19.2, 42.7) | 39.3 (29.4, 49.2)         | 3 (2, 3)                   | 4 (3, 6)   | 3 (3, 4)         |
| Pooled           | n=251                       | n=255      | n=506            | n=252     | n=251                                | n=255             | n=506                     | n=251                      | n=255      | n=506            |
| 30 minutes*      | 86 (34.3)                   | 77 (30.2)  | 163 (32.2)       | 44 (17.5) | 16.8 (9.3, 24.3)                     | 12.7 (5.4, 20.1)  | 14.8 (8.5, 21.0)          | 6 (5, 11)                  | 8 (5, 19)  | 7 (5, 12)        |
| 1 hour*          | 175 (69.7)                  | 141 (55.3) | 316 (62.5)       | 71 (28.2) | 41.5 (33.6, 49.5)                    | 27.1 (18.9, 35.4) | 34.3 (27.3, 41.3)         | 3 (3, 3)                   | 4 (3, 6)   | 3 (3, 4)         |
| 2 hours*         | 217 (86.5)                  | 172 (67.5) | 389 (76.9)       | 93 (36.9) | 49.5 (42.2, 56.9)                    | 30.5 (22.3, 38.8) | 40.0 (33.0, 47.0)         | 3 (2, 3)                   | 4 (3, 5)   | 3 (3, 4)         |
| 4 hours*         | 209 (83.3)                  | 162 (63.5) | 371 (73.3)       | 84 (33.3) | 49.9 (42.5, 57.4)                    | 30.2 (21.9, 38.5) | 40.0 (33.0, 47.0)         | 3 (2, 3)                   | 4 (3, 5)   | 3 (3, 4)         |

\*Nominal  $P < .05$ , indicating treatment response rates significantly different from placebo, based on Fisher's exact test.

<sup>a</sup>Responder defined as achieving a score of 1 ("very much improved" or 2 "much improved") on the CGI-I scale.

<sup>b</sup>Sublingual dexmedetomidine vs placebo.

<sup>c</sup>Not statistically significant; the 95% CI contains "infinity".

Abbreviations: CGI-I, Clinical Global Impressions-Improvement; CI, confidence interval; ns, not statistically significant.

Table S6. PEC change scores and effect size difference from placebo as measured by Cohen’s d from baseline from 10 minutes to 24 after a dose of sublingual dexmedetomidine in subjects with schizophrenia, bipolar disorder, and pooled

| Time postdose           | Placebo |                                      |  | Sublingual dexmedetomidine 120 ug |                                      |                       | Sublingual dexmedetomidine 180 ug |                                      |                       | Sublingual dexmedetomidine Pooled |                                      |                       |
|-------------------------|---------|--------------------------------------|--|-----------------------------------|--------------------------------------|-----------------------|-----------------------------------|--------------------------------------|-----------------------|-----------------------------------|--------------------------------------|-----------------------|
|                         | n       | Mean (SD)<br>change from<br>baseline |  | n                                 | Mean (SD)<br>change from<br>baseline | Cohen’s d<br>(95% CI) | n                                 | Mean (SD)<br>change from<br>baseline | Cohen’s d<br>(95% CI) | n                                 | Mean (SD)<br>change from<br>baseline | Cohen’s d<br>(95% CI) |
| <b>Schizophrenia</b>    |         |                                      |  |                                   |                                      |                       |                                   |                                      |                       |                                   |                                      |                       |
| Predose                 | 126     |                                      |  | 129                               |                                      |                       | 125                               |                                      |                       | 254                               |                                      |                       |
| 10 minutes              | 126     | -1.3 (2.17)                          |  | 129                               | -1.3 (2.50)                          | .15 (-.10, .40)       | 125                               | -2.0 (3.19)                          | .13 (-.12, .38)       | 254                               | -1.7 (2.88)                          | .13 (-.07, .33)       |
| 20 minutes              | 126     | -2.5 (3.20)                          |  | 129                               | -2.8 (4.03)                          | .23 (-.02, .48)       | 125                               | -3.9 (4.54)                          | .21 (-.04, .46)       | 254                               | -3.4 (4.31)                          | .21 (.01, .41)        |
| 30 minutes              | 126     | -3.1 (3.56)                          |  | 129                               | -4.4 (4.90)                          | .44 (.19, .69)        | 125                               | -5.7 (5.27)                          | .42 (.17, .67)        | 254                               | -5.0 (5.11)                          | .41 (.20, .61)        |
| 45 minutes              | 126     | -3.6 (3.78)                          |  | 129                               | -5.7 (5.18)                          | .67 (.41, .92)        | 125                               | -7.6 (5.32)                          | .66 (.40, .91)        | 254                               | -6.6 (5.33)                          | .62 (.41, .83)        |
| 1 hour                  | 126     | -4.1 (4.16)                          |  | 129                               | -6.9 (5.06)                          | .81 (.55, 1.06)       | 125                               | -8.8 (4.96)                          | .82 (.56, 1.08)       | 254                               | -7.8 (5.09)                          | .78 (.57, .99)        |
| 1.5 hours               | 126     | -4.6 (4.38)                          |  | 129                               | -8.0 (5.00)                          | .92 (.66, 1.18)       | 125                               | -9.8 (4.60)                          | .97 (.70, 1.23)       | 254                               | -8.9 (4.88)                          | .92 (.71, 1.13)       |
| 2 hours                 | 126     | -4.7 (4.69)                          |  | 129                               | -8.4 (4.83)                          | .98 (.72, 1.24)       | 125                               | -10.4 (4.34)                         | 1.03 (.76, 1.29)      | 254                               | -9.4 (4.69)                          | .99 (.78, 1.21)       |
| 4 hours                 | 82      | -6.4 (4.24)                          |  | 105                               | -9.1 (4.58)                          | .76 (.46, 1.06)       | 122                               | -10.3 (4.26)                         | .80 (.51, 1.08)       | 227                               | -9.8 (4.44)                          | .77 (.54, 1.00)       |
| 6 hours                 | 107     | -5.4 (4.28)                          |  | 116                               | -8.0 (4.25)                          | .79 (.52, 1.07)       | 124                               | -9.4 (3.99)                          | .82 (.55, 1.09)       | 240                               | -8.8 (4.17)                          | .80 (.58, 1.02)       |
| 8 hours                 | 118     | -5.7 (4.04)                          |  | 119                               | -8.0 (3.92)                          | .76 (.50, 1.03)       | 125                               | -9.5 (3.94)                          | .76 (.50, 1.02)       | 244                               | -8.7 (3.99)                          | .76 (.54, .97)        |
| 24 hours                | 126     | -4.4 (3.66)                          |  | 126                               | -5.4 (4.03)                          | .45 (.20, .70)        | 124                               | -6.8 (4.41)                          | .43 (.18, .68)        | 250                               | -6.1 (4.27)                          | .42 (.22, .63)        |
| <b>Bipolar Disorder</b> |         |                                      |  |                                   |                                      |                       |                                   |                                      |                       |                                   |                                      |                       |
| Predose                 | 126     |                                      |  | 126                               |                                      |                       | 126                               |                                      |                       | 252                               |                                      |                       |
| 10 minutes              | 126     | -1.0 (1.85)                          |  | 126                               | -1.6 (2.65)                          | .26 (.01, .50)        | 126                               | -1.6 (3.06)                          | .23 (-.02, .48)       | 252                               | -1.6 (2.85)                          | .23 (.02, .43)        |
| 20 minutes              | 126     | -1.9 (3.00)                          |  | 126                               | -2.9 (3.83)                          | .33 (.08, .58)        | 126                               | -3.1 (4.45)                          | .30 (.05, .55)        | 252                               | -3.0 (4.14)                          | .30 (.09, .50)        |
| 30 minutes              | 126     | -2.8 (3.85)                          |  | 126                               | -4.3 (4.86)                          | .39 (.14, .64)        | 126                               | -4.6 (5.08)                          | .38 (.13, .63)        | 252                               | -4.5 (4.96)                          | .37 (.16, .57)        |
| 45 minutes              | 126     | -3.6 (4.14)                          |  | 126                               | -6.3 (5.30)                          | .60 (.35, .86)        | 126                               | -6.7 (5.12)                          | .62 (.36, .87)        | 252                               | -6.5 (5.20)                          | .59 (.38, .80)        |
| 1 hour                  | 126     | -4.4 (4.53)                          |  | 126                               | -7.5 (5.19)                          | .73 (.48, .99)        | 126                               | -8.4 (5.17)                          | .74 (.48, .99)        | 252                               | -7.9 (5.19)                          | .72 (.51, .93)        |
| 1.5 hours               | 126     | -4.7 (4.52)                          |  | 126                               | -8.6 (5.28)                          | .91 (.65, 1.17)       | 126                               | -9.7 (4.90)                          | .95 (.69, 1.21)       | 252                               | -9.2 (5.12)                          | .91 (.70, 1.12)       |
| 2 hours                 | 126     | -4.9 (4.67)                          |  | 126                               | -9.0 (5.26)                          | .97 (.71, 1.23)       | 126                               | -10.4 (4.45)                         | 1.06 (.79, 1.32)      | 252                               | -9.7 (4.91)                          | 1.00 (.78, 1.21)      |
| 4 hours                 | 76      | -7.1 (4.47)                          |  | 108                               | -9.5 (4.24)                          | .69 (.39, .99)        | 115                               | -10.6 (3.57)                         | .76 (.46, 1.05)       | 223                               | -10.1 (3.94)                         | .74 (.50, .97)        |
| 6 hours                 | 99      | -6.6 (4.84)                          |  | 113                               | -9.2 (4.35)                          | .66 (.38, .93)        | 119                               | -9.9 (3.68)                          | .71 (.43, .98)        | 232                               | -9.6 (4.02)                          | .70 (.48, .93)        |
| 8 hours                 | 118     | -6.2 (4.61)                          |  | 116                               | -8.5 (4.18)                          | .59 (.33, .86)        | 123                               | -9.1 (3.63)                          | .63 (.37, .89)        | 239                               | -8.8 (3.91)                          | .63 (.42, .84)        |
| 24 hours                | 125     | -4.1 (4.04)                          |  | 125                               | -5.6 (4.16)                          | .41 (.16, .66)        | 124                               | -5.9 (4.38)                          | .40 (.15, .65)        | 249                               | -5.8 (4.27)                          | .40 (.20, .61)        |

| Time postdose | Placebo |                                      |     | Sublingual dexmedetomidine 120 ug    |                       |     | Sublingual dexmedetomidine 180 ug    |                       |     | Sublingual dexmedetomidine Pooled    |                       |  |
|---------------|---------|--------------------------------------|-----|--------------------------------------|-----------------------|-----|--------------------------------------|-----------------------|-----|--------------------------------------|-----------------------|--|
|               | n       | Mean (SD)<br>change from<br>baseline | n   | Mean (SD)<br>change from<br>baseline | Cohen's d<br>(95% CI) | n   | Mean (SD)<br>change from<br>baseline | Cohen's d<br>(95% CI) | n   | Mean (SD)<br>change from<br>baseline | Cohen's d<br>(95% CI) |  |
| Pooled        |         |                                      |     |                                      |                       |     |                                      |                       |     |                                      |                       |  |
| Predose       | 252     |                                      | 255 |                                      |                       | 251 |                                      |                       | 506 |                                      |                       |  |
| 10 minutes    | 252     | -1.2 (2.02)                          | 255 | -1.4 (2.57)                          | .20 (.03, .38)        | 251 | -1.8 (3.13)                          | .18 (.00, .35)        | 506 | -1.6 (2.86)                          | .18 (.04, .32)        |  |
| 20 minutes    | 252     | -2.2 (3.11)                          | 255 | -2.9 (3.92)                          | .28 (.10, .45)        | 251 | -3.5 (4.50)                          | .25 (.08, .43)        | 506 | -3.2 (4.23)                          | .25 (.11, .40)        |  |
| 30 minutes    | 252     | -3.0 (3.70)                          | 255 | -4.4 (4.87)                          | .41 (.24, .59)        | 251 | -5.2 (5.19)                          | .40 (.22, .57)        | 506 | -4.8 (5.04)                          | .39 (.24, .53)        |  |
| 45 minutes    | 252     | -3.6 (3.96)                          | 255 | -6.0 (5.24)                          | .63 (.46, .81)        | 251 | -7.2 (5.23)                          | .64 (.46, .82)        | 506 | -6.6 (5.26)                          | .61 (.46, .75)        |  |
| 1 hour        | 252     | -4.2 (4.34)                          | 255 | -7.2 (5.13)                          | .77 (.59, .95)        | 251 | -8.6 (5.06)                          | .78 (.59, .96)        | 506 | -7.9 (5.14)                          | .75 (.60, .90)        |  |
| 1.5 hours     | 252     | -4.6 (4.44)                          | 255 | -8.3 (5.14)                          | .92 (.73, 1.10)       | 251 | -9.8 (4.75)                          | .96 (.77, 1.14)       | 506 | -9.0 (5.00)                          | .92 (.77, 1.07)       |  |
| 2 hours       | 252     | -4.8 (4.67)                          | 255 | -8.7 (5.05)                          | .97 (.79, 1.16)       | 251 | -10.4 (4.39)                         | 1.05 (.86, 1.23)      | 506 | -9.6 (4.80)                          | 1.00 (.84, 1.15)      |  |
| 4 hours       | 158     | -6.7 (4.35)                          | 213 | -9.3 (4.41)                          | .73 (.52, .94)        | 237 | -10.5 (3.94)                         | .78 (.58, .99)        | 450 | -9.9 (4.20)                          | .76 (.59, .92)        |  |
| 6 hours       | 206     | -5.9 (4.59)                          | 229 | -8.6 (4.33)                          | .72 (.53, .92)        | 243 | -9.7 (3.84)                          | .76 (.57, .96)        | 472 | -9.2 (4.11)                          | .75 (.60, .91)        |  |
| 8 hours       | 236     | -5.9 (4.34)                          | 235 | -8.2 (4.05)                          | .67 (.49, .86)        | 248 | -9.3 (3.79)                          | .69 (.51, .88)        | 483 | -8.8 (3.95)                          | .69 (.54, .84)        |  |
| 24 hours      | 251     | -4.2 (3.85)                          | 251 | -5.5 (4.09)                          | .43 (.25, .61)        | 248 | -6.4 (4.41)                          | .41 (.23, .59)        | 499 | -5.9 (4.27)                          | .41 (.27, .56)        |  |

Abbreviations: CI, confidence interval; SD, standard deviation.
